# Supplementary material for: Integrative sequence and tissue expression profiling of chicken and mammalian aquaporins
Source: PubMed Central journal article supplement (PMC2966333; doi:10.1186/1471-2164-10-s2-s7), 2009-07-14
Supplement: 1471-2164-10-S2-S7-S1.pdf [file 1471-2164-10-S2-S7-S1.pdf]

AQP0 - CLUSTAL W (1.83) multiple sequence alignment

```
ENSMUST00000026455      MWELRSASFWRIFAFAEFFATLFYVFFGLGASLRWAPGPLHVLQVALAFGLALATLVQTVG 60
ENSRNOT00000004223      MWELRSASFWRIFAFAEFFATLFYVFFGLGSSLRWAPGPLHVLQVALAFGLALATLVQTVG 60
ENST00000257979         MWELRSASFWRIFAFAEFFATLFYVFFGLGSSLRWAPGPLHVLQVAMAFGLALATLVQSVG 60
                          *****:*****:*****:***

ENSMUST00000026455      HISGAHVNPVTF AFLVGSQMSLLRAFCYIAAQLLGAVAGAAVLYSVTPPAVRGNLALNT 120
ENSRNOT00000004223      HISGAHVNPVTF AFLVGSQMSLLRAFCYIAAQLLGAVAGAAVLYSVTPPAVRGNLALNT 120
ENST00000257979         HISGAHVNPVTF AFLVGSQMSLLRAFCYMAAQLLGAVAGAAVLYSVTPPAVRGNLALNT 120
                          *****:*****:*****:***

ENSMUST00000026455      LHAGVSVGQATTVEIFLTLQFVLCIFATYDERRNGRMGSVALAVGFSLTLGHLFGMYTYG 180
ENSRNOT00000004223      LHAGVSVGQATTVEIFLTLQFVLCIFATYDERRNGRMGSVALAVGFSLTLGHLFGMYTYG 180
ENST00000257979         LHPAVSVGQATTVEIFLTLQFVLCIFATYDERRNGQLGSVALAVGFSLALGHLFGMYTYG 180
                          **.*****:*****:*****

ENSMUST00000026455      AGMNPARSFAPAILTRNFSNHVYVWGPIIGGGLGSLLYDFLLFPRLKSVSERLSILKGA 240
ENSRNOT00000004223      AGMNPARSFAPAILTRNFSNHVYVWGPIIGGGLGSLLYDFLLFPRLKSVSERLSILKGA 240
ENST00000257979         AGMNPARSFAPAILTGNFTNHVYVWGPIIGGGLGSLLYDFLLFPRLKSISERLSVLKGA 240
                          ***** **:*****:*****:****:****

ENSMUST00000026455      RPSDSNGQPEGTGEPVELKTQAL 263
ENSRNOT00000004223      RPSDSNGQPEGTGEPVELKTQAL 263
ENST00000257979         KPDVSNQPEVTGEPVELNTQAL 263
                          :*.***** *****:****
```

AQP1 - CLUSTAL W (1.83) multiple sequence alignment

```
ENSMUST00000004774 MASEIKKKLFWRAVVAEFLAMTLFVVISIGSALGFNYPLERN-QTLVQDNVKVSLAFGLS 59
ENSRNOT00000015692 MASEIKKKLFWRAVVAEFLAMTLFVVISIGSALGFNYPLERN-QTLVQDNVKVSLAFGLS 59
ENSGALT00000008364 MASEFKKKMFWRVVAEFLAMILFIFISIGSALGFNFPVSVNGTSATQDNVKVSLAFGLS 60
ENST00000311813 MASEFKKKLFWRAVVAEFLATTLFVVISIGSALGFKYPVGNQ-QTAVQDNVKVSLAFGLS 59
ENST00000265298 -----

ENSMUST00000004774 IATLAQSVGHISGAHLNPAVTLGLLLSQCISILRAVMIYIAQCVGAIVATAILSGITSSL 119
ENSRNOT00000015692 IATLAQSVGHISGAHLNPAVTLGLLLSQCISILRAVMIYIAQCVGAIVASAILSGITSSL 119
ENSGALT00000008364 IATMAQSVGHISGAHLNPAVTLGLLLSQCISIFKALMYILAQCLGAVVATAILSGVTSSL 120
ENST00000311813 IATLAQSVGHISGAHLNPAVTLGLLLSQCISIFRALMYIYIAQCVGAIVATAILSGITSSL 119
ENST00000265298 -----MYIYIAQCVGAIVATAILSGITSSL 24
                                     ***:***:***:***:*****:***

ENSMUST00000004774 VDNSLGRNDLAHGVNSGQGLGIEIIGTLQLVLCVLAATDRRRRDLGGSAPLAIGLSVALG 179
ENSRNOT00000015692 LENS LGRNDLARGVNSGQGLGIEIIGTLQLVLCVLAATDRRRRDLGGSAPLAIGLSVALG 179
ENSGALT00000008364 PYNSLGLNALAKGINAGQGLGIEI IATLQLVLCVLAATDRRRNDVSGSAPLAIGLSVALG 180
ENST00000311813 TGNSLGRNDLADGVNSGQGLGIEIIGTLQLVLCVLAATDRRRRDLGGSAPLAIGLSVALG 179
ENST00000265298 TGNSLGRNDLADGVNSGQGLGIEIIGTLQLVLCVLAATDRRRRDLGGSAPLAIGLSVALG 84
                                     **** * * * *:*****.*****. *:*****

ENSMUST00000004774 HLLAIDYTGCGINPARSFGSAVLTRNFSNHWFVWVGPFIGGALAVLIYDFILAPRSSDFT 239
ENSRNOT00000015692 HLLAIDYTGCGINPARSFGSAVLTRNFSNHWFVWVGPFIGSALAVLIYDFILAPRSSDFT 239
ENSGALT00000008364 HLLAIDYTGCGINPARSFGSALIANNFENHWIFWVGP IIGGAGAALIYDFILAPRSSDLT 240
ENST00000311813 HLLAIDYTGCGINPARSFGSAVITHNFSNHWFVWVGPFIGGALAVLIYDFILAPRSSDLT 239
ENST00000265298 HLLAIDYTGCGINPARSFGSAVITHNFSNHWFVWVGPFIGGALAVLIYDFILAPRSSDLT 144
                                     *****:*. * .*****:*. * .*****:*.

ENSMUST00000004774 DRMKVWTSQVVEEYDLADADDINSR-----VEMKPK----- 269
ENSRNOT00000015692 DRMKVWTSQVVEEYDLADADDINSR-----VEMKPK----- 269
ENSGALT00000008364 DRVKVWTSQVVEEYDLEDDMNSR-----VEMKPK----- 270
ENST00000311813 DRVKVWTSQVVEEYDLADADDINSR-----VEMKPK----- 269
ENST00000265298 DRVKVWTSQVVEEYDLADADDINSRSFLGTKIYQFTHSLEVVEEVKERDPPASRPSEHDGR 204
                                     **:*****:*.**:*
                                               *:*

ENSMUST00000004774 -----
ENSRNOT00000015692 -----
ENSGALT00000008364 -----
ENST00000311813 -----
ENST00000265298 CARKSPLAPKLLTDSPAQVPGILP 228
```

AQP2 - CLUSTAL W (1.83) multiple sequence alignment

```
ENSMUST00000023752    MWELRSIAFSRAVLAEFLATLLFVFFGLGSALQWASSPPSVLQIAVAFGLGIGTLVQALG 60
ENSRNOT00000000324    MWELRSIAFSRAVLAEFLATLLFVFFGLGSALQWASSPPSVLQIAVAFGLGIGTLVQALG 60
ENST00000199280      MWELRSIAFSRAVFAEFLATLLFVFFGLGSALNWPQALPSVLQIAMAFAFGLGIGTLVQALG 60
                      *****:*****:*.:.: *****:*****
ENSMUST00000023752    HVSGAHINPAVTVACLVGCHVSFLRAAFYVAAQLLGAVAGAAILHEITPVEIRGDLAVNA 120
ENSRNOT00000000324    HVSGAHINPAVTVACLVGCHVSFLRAAFYVAAQLLGAVAGAAILHEITPVEIRGDLAVNA 120
ENST00000199280      HISGAHINPAVTVACLVGCHVSFLRAAFYVAAQLLGAVAGAAALLHEITPADIRGDLAVNA 120
                      *:*****.*****:*****:*****:*****
ENSMUST00000023752    LHNNATAGQAVTVELFLTMQLVLCIFASTDERRSDNLGSPALSIGFSVTLGHLLGIYFTG 180
ENSRNOT00000000324    LHNNATAGQAVTVELFLTMQLVLCIFASTDERRGDNLGSPALSIGFSVTLGHLLGIYFTG 180
ENST00000199280      LSNSTTAGQAVTVELFLTLQLVLCIFASTDERRGENPGTPALSIGFSVALGHLLGIHYTG 180
                      * *.:*****:*****:*. *.:*****:*****:***
ENSMUST00000023752    CSMNPARSLAPAVVTGKFDDHWFVWIGPLVGAVIGSLLYNYLLFPSTKSLQERLAVLKGL 240
ENSRNOT00000000324    CSMNPARSLAPAVVTGKFDDHWFVWIGPLVGAIIGSLLYNYLLFPSAKSLQERLAVLKGL 240
ENST00000199280      CSMNPARSLAPAVVTGKFDDHWFVWIGPLVGAILGSLLYNYVLFPPAKSLSERLAVLKGL 240
                      *****:*****:***.:***.*****
ENSMUST00000023752    EPDTEWEEREVRRRQSVELHSPQSLPRGSKA 271
ENSRNOT00000000324    EPDTEWEEREVRRRQSVELHSPQSLPRGSKA 271
ENST00000199280      EPDTEWEEREVRRRQSVELHSPQSLPRGTKA 271
                      *****:***
```

AQP3 - CLUSTAL W (1.83) multiple sequence alignment

```
ENSMUST00000055327 MGRQKELMNRCEMHLIRYRLLRQALAECLGTLILVMFGCGSVAQVVLSRGTHGGFLTIN 60
ENSRNOT00000013803 MGRQKELMNRCEMHLIRYRLLRQALAECLGTLILVMFGCGSVAQVVLSRGTHGGFLTIN 60
ENST00000297991 MGRQKELVSRCEMHLIRYRLLRQALAECLGTLILVMFGCGSVAQVVLSRGTHGGFLTIN 60
ENSGALT00000003868 MGRQKDVLATIEEHLRIRNKLVRQALAECLGTLILVLFVFGCGSVAQIVLSRGTHGGFLTIN 60
ENST00000343952 MGRQKELVSRCEMHLIRYRLLRQALAECLGTLILVMFGCGSVAQVVLSRGTHGGFLTIN 60
ENST00000379492 -----MFGCGSVAQVVLSRGTHGGFLTIN 24
                                         :*****:*****:*

ENSMUST00000055327 LAFGFAVTLGILVAGQVSGAHLNPAVTFAMCFLAREPWIKLPIYALAQTLAGAFLGAGIVF 120
ENSRNOT00000013803 LAFGFAVTLAILVAGQVSGAHLNPAVTFAMCFLAREPWIKLPIYTLAQTLAGAFLGAGIVF 120
ENST00000297991 LAFGFAVTLGILVAGQVSGAHLNPAVTFAMCFLAREPWIKLPIYTLAQTLAGAFLGAGIVF 120
ENSGALT00000003868 LAFGFAVMLGILVAGQVSGGHLNPAVTFAMCFLAREPWIKLPVYALAQTLAGAFLGAGIVF 120
ENST00000343952 LAFGFAVTLGILVAGQVSGAHLNPAVTFAMCFLAREPWIKLPIYTLAQTLAGAFLGAGIVF 120
ENST00000379492 LAFGFAVTLGILVAGQVSGAHLNPAVTFAMCFLAREPWIKLPIYTLAQTLAGAFLGAGIVF 84
***** * .*:*****.*****:*****:*****

ENSMUST00000055327 GLYY--DAIWAFANNELFVSGPNGTAGIFATYPSGHLDMVNGFFDQFIGTAALIVCVLAI 178
ENSRNOT00000013803 GLYY--DAIWAFAGNELVSGPNGTAGIFATYPSGHLDMVNGFFDQFIGTAALIVCVLAI 178
ENST00000297991 GLYY--DAIWHFADNQLFVSGPNGTAGIFATYPSGHLDMINGFFDQFIGTASLIVCVLAI 178
ENSGALT00000003868 GLYHAPDAIWAFGSNHLVVTGENATAGIFATYPSQHLNVVNGFFDQFIGTASLIVCVLAI 180
ENST00000343952 GLYY--DAIWHFADNQLFVSGPNGTAGIFATYPSGHLDMINGFFDQDRPALVVGHRVPT 178
ENST00000379492 GLYY--DAIWHFADNQLFVSGPNGTAGIFATYPSGCTYISR-----SSGTCFCHN 132
***:  *** *..* *:* *..***** : .

ENSMUST00000055327 VDPYNN--PVPRGLEAFTVGLVVLVIGTSMGFNSGYAVNPARDFGPRFLTALAGWGSEVF 236
ENSRNOT00000013803 VDPYNN--PVPRGLEAFTVGLVVLVIGTSMGFNSGYAVNPARDFGPRFLTALAGWGSEVF 236
ENST00000297991 VDPYNN--PVPRGLEAFTVGLVVLVIGTSMGFNSGYAVNPARDFGPRFLTALAGWGSVAVF 236
ENSGALT00000003868 VDPFN--PVPPGLEAFTVGFVVLVIGTSMGFYSGYAVNPARDFGPRFLTALAGWGTEVF 238
ENST00000343952 PGLHCGCLRVPAADRLLPPGAAPTLQRGREC-----EAGPCEAQGADLSGQGSPLRCPGL 232
ENST00000379492 AGMKGG---VKSGHKFHVCFVFL-----FLMYVADVTVLGIIRDGRPHF 173
. . * . . . * . :

ENSMUST00000055327 TTGRHWWVPIVSPLLGSIAGVFVYQLMIGCHLEQPPPSTEEENVKLAHMKHKEQI 292
ENSRNOT00000013803 TTGQNWVWVPIVSPLLGSIAGVFVYQLMIGCHLEQPLPSTEAEENVKLAHMKHKEQI 292
ENST00000297991 TTGQHWWVPIVSPLLGSIAGVFVYQLMIGCHLEQPPPSNEEENVKLAHVKHKEQI 292
ENSGALT00000003868 WTGKQWVWVPIVAPFLGAIAGVIVYQLMIGCHDEPSPASEQETVKKLANVKHKERV 294
ENST00000343952 EHPL-----TVQGPLP---RSPLHDPFQAKELPIYPHPTTAPSGFPLDLAQIAP- 279
ENST00000379492 RKGR-----HSFNPLL---NNVLFYFYIKKNINMCL----- 202
* : . : : .
```

AQP4 - CLUSTAL W (1.83) multiple sequence alignment

```

ENST00000339532 -----
ENST00000383168 -----
ENSGALT00000024413 -----SKCARLCKCESIMVAFKG 18
ENSGALT00000036809 -----
ENSMUST00000115856 MVHGF GCFVFFFLISLSSLWASEDSTCNSTLPLCHLATTLDCKCKGHSCSRESIMVAFKG 60
ENSMUST00000079081 -----MSDRAAARRWGKCGHSCSRESIMVAFKG 28
ENST00000383170 -----
ENSRNOT00000048109 -----
ENSRNOT00000021961 -----

ENST00000339532 -----
ENST00000383168 -----
ENSGALT00000024413 VWTQPFWKAVSAEFLAMLIFVLLSLGSTINWGGSEKPLPVDMLISLCFGLSIATMVQCF 78
ENSGALT00000036809 -----
ENSMUST00000115856 VWTQAFWKAVSAEFLATLIFVLLGVGSTINWGGSENPLPVDMLISLCFGLSIATMVQCF 120
ENSMUST00000079081 VWTQAFWKAVSAEFLATLIFVLLGVGSTINWGGSENPLPVDMLISLCFGLSIATMVQCF 88
ENST00000383170 -----
ENSRNOT00000048109 -----
ENSRNOT00000021961 -----

ENST00000339532 -----MSDRPTARRWGKCGPLCTREN----- 21
ENST00000383168 -----MSDRPTARRWGKCGPLCTRENIMVAFKGVWTQAFWKAVTAEFLA 44
ENSGALT00000024413 GHISGGHINPAVTVAMVCTRKISLAKSVFYILAQCLG----- 115
ENSGALT00000036809 -----HINPAVTVAMVCTRKISLAKSVFYILAQCLG----- 31
ENSMUST00000115856 GHISGGHINPAVTVAMVCTRKISIAKSVFYIIAQCLG----- 157
ENSMUST00000079081 GHISGGHINPAVTVAMVCTRKISIAKSVFYIIAQCLG----- 125
ENST00000383170 -----CTLAGEGMSDRPTARRWGKCGPLCTREN----- 28
ENSRNOT00000048109 -----MSDGAARRWGKCGPPCSRES----- 21
ENSRNOT00000021961 -----MSDGAARRWGKCGPPCSRES----- 21
                : . : . . .

ENST00000339532 -----
ENST00000383168 MLIFVLLSLGSTINWGGTEKPLPVDMLISLCFGLSIATMVQCFGHISGGHINPAVTVAM 104
ENSGALT00000024413 -----
ENSGALT00000036809 -----
ENSMUST00000115856 -----
ENSMUST00000079081 -----
ENST00000383170 -----
ENSRNOT00000048109 -----
ENSRNOT00000021961 -----

ENST00000339532 -----IMGAGILYLVTTPPSVVGGLGVTMVHGNLTAG----- 52
ENST00000383168 VCTRKISIAKSVFYIAAQCLGAIIGAGILYLVTTPPSVVGGLGVTMVHGNLTAG----- 157
ENSGALT00000024413 -----AIVGAGILYLITPPSVVGGLGVTAVHGDLSAG----- 147
ENSGALT00000036809 -----AIVGAGILYLITPPSVVGGLGVTAVHGDLSAG----- 63
ENSMUST00000115856 -----AIIGAGILYLVTTPPSVVGGLGVTMVHGNLTAG----- 189
ENSMUST00000079081 -----AIIGAGILYLVTTPPSVVGGLGVTMVHGNLTAG----- 157
ENST00000383170 -----IMVAFKGVWTQAFWKAVTAEFLAMLIFVLLSLGSTINWGG 68
ENSRNOT00000048109 -----IMVAFKGVWTQAFWKAVTAEFLAMLIFVLLSVGSTINWGG 61
ENSRNOT00000021961 -----IMVAFKGVWTQAFWKAVTAEFLAMLIFVLLSVGSTINWGG 61
                : * : * . . : . : * : *

ENST00000339532 --HGLLVELIIT--FQLVFTIFASCDSKRT--DVTGSIALAIGFSVAIGHLFAINYTGA 105
ENST00000383168 --HGLLVELIIT--FQLVFTIFASCDSKRT--DVTGSIALAIGFSVAIGHLFAINYTGA 210
ENSGALT00000024413 --HGLLVELIIT--FQLVFTIFASCDSKRS--DVTGSVALAIGFSVAIGHLFAINYTGA 200
ENSGALT00000036809 --HGLLVELIIT--FQLVFTIFASCDSKRS--DVTGSVALAIGFSVAIGHLFAINYTGA 116
ENSMUST00000115856 --HGLLVELIIT--FQLVFTIFASCDSKRT--DVTGSIALAIGFSVAIGHLFAINYTGA 242
ENSMUST00000079081 --HGLLVELIIT--FQLVFTIFASCDSKRT--DVTGSIALAIGFSVAIGHLFAINYTGA 210
ENST00000383170 TEKPLPVDMLISLCFGLSIATMVQCFGHISGGHINPAVTVAMVCTRKISIAKSVFYIAA 128
ENSRNOT00000048109 SENPLPVDMLISLCFGLSIATMVQCFGHISGGHINPAVTVAMVCTRKISIAKSVFYITA 121
ENSRNOT00000021961 SENPLPVDMLISLCFGLSIATMVQCFGHISGGHINPAVTVAMVCTRKISIAKSVFYITA 121
                : * * : : : * * : : . . * : : : . . : : * : : * *

ENST00000339532 SMNPAR----- 111
ENST00000383168 SMNPAR----- 216
ENSGALT00000024413 SMNPAR----- 206
ENSGALT00000036809 SMNPA----- 121
ENSMUST00000115856 SMNPAR----- 248
ENSMUST00000079081 SMNPAR----- 216
ENST00000383170 QCVG----- 132
ENSRNOT00000048109 QCLGAIIGAGILYLVTTPPSVVGGLGVTIN----- 151
ENSRNOT00000021961 QCLGAIIGAGILYLVTTPPSVVGGLGVTMVHGNLTAGHGLLVELIITFQLVFTIFASCDSK 181
                .

ENST00000339532 -----SFGPAVIMGNWENHWIYVWGPIIGA 136
ENST00000383168 -----SFGPAVIMGNWENHWIYVWGPIIGA 241
ENSGALT00000024413 -----SFGPAVIMGNWENHWIYVWGPIIGA 231
ENSGALT00000036809 -----

```

|                    |                                                              |     |
|--------------------|--------------------------------------------------------------|-----|
| ENSMUST00000115856 | -----SFGPAVIMGNWANHWIYWVGPIIGA                               | 273 |
| ENSMUST00000079081 | -----SFGPAVIMGNWANHWIYWVGPIIGA                               | 241 |
| ENST00000383170    | -----PIIGA                                                   | 137 |
| ENSRNOT00000048109 | -----YTGASMNPARSFGPAVIMGNWENHWIYWVGPIIGA                     | 186 |
| ENSRNOT00000021961 | RTDVTGSVALAIGFSVAIGHLFAINYTGASMNPARSFGPAVIMGNWENHWIYWVGPIIGA | 241 |

|                    |                                                               |     |
|--------------------|---------------------------------------------------------------|-----|
| ENST00000339532    | VLAGGLYEYVFCPDVEFKRRFKEAFSKAAQQTGGSYMEVEDNRSQVETDDLILKPGVVHV  | 196 |
| ENST00000383168    | VLAGGLYEYVFCPDVEFKRRFKEAFSKAAQQTGGSYMEVEDNRSQVETDDLILKPGVVHV  | 301 |
| ENSGALT00000024413 | VLAGALYEYVYCPDMELKRRFKDVFSSKATQPSKGKYIEVDDTRSHVETDDLILKPGIVHV | 291 |
| ENSGALT00000036809 | -----                                                         |     |
| ENSMUST00000115856 | VLAGALYEYVFCPDVELKRRLKEAFSKAAQQTGGSYMEVEDNRSQVETEDLILKPGVVHV  | 333 |
| ENSMUST00000079081 | VLAGALYEYVFCPDVELKRRLKEAFSKAAQQTGGSYMEVEDNRSQVETEDLILKPGVVHV  | 301 |
| ENST00000383170    | VLAGGLYEYVFCPDVEFKRRFKEAFSKAAQQTGGSYMEVEDNRSQVETDDLILKPGVVHV  | 197 |
| ENSRNOT00000048109 | VLAGALYEYVFCPDVELKRRLKEAFSKAAQQTGGSYMEVEDNRSQVETEDLILKPGVVHV  | 246 |
| ENSRNOT00000021961 | VLAGALYEYVFCPDVELKRRLKEAFSKAAQQTGGSYMEVEDNRSQVETEDLILKPGVVHV  | 301 |

|                    |                        |     |
|--------------------|------------------------|-----|
| ENST00000339532    | IDVDRGEEKKGGKQSGEVLSSV | 218 |
| ENST00000383168    | IDVDRGEEKKGGKQSGEVLSSV | 323 |
| ENSGALT00000024413 | IDIDRSEDKKGRDPSSEVLSSV | 313 |
| ENSGALT00000036809 | -----                  |     |
| ENSMUST00000115856 | IDIDRGEEKKGGKDSSEVLSSV | 355 |
| ENSMUST00000079081 | IDIDRGEEKKGGKDSSEVLSSV | 323 |
| ENST00000383170    | IDVDRGEEKKGGKQSGEVLSSV | 219 |
| ENSRNOT00000048109 | IDIDRGDEKKGGKDSSEVLSSV | 268 |
| ENSRNOT00000021961 | IDIDRGDEKKGGKDSSEVLSSV | 323 |

AQP5 - CLUSTAL W (1.83) multiple sequence alignment

```

ENSMUST00000042340 -----MKKEVCSVAFFKAVFAEFLATLIFVF 26
ENSRNOT00000024102 -----MKKEVCSLAFFKAVFAEFLATLIFVF 26
ENSMUST00000088200 -----MKKEVCSVAFFKAVFAEFLATLIFVF 26
ENSRNOT00000040874 -----MKKEVCSLAFFKAVFAEFLATLIFVF 26
ENST000000293599 -----MKKEVCSVAFLKAVFAEFLATLIFVF 26
ENSGALT00000041244 -----STLIFVF 7
ENSGALT00000041246 -----EILTlafaravfvefistlifvf 23
ENSGALT0000004288 APPDQQRQWELSSKAVVFFAPRVHRGSHPPPTPTMKREILTlafaravfvefistlifvf 60
                               :*****

ENSMUST00000042340 FGLGSALKWPSALPTILQISIAFGLAIGTLAQALGPVSGGHINPAITLALLIGNQISLLR 86
ENSRNOT00000024102 FGLGSALKWPSALPTILQISIAFGLAIGTLAQALGPVSGGHINPAITLALLIGNQISLLR 86
ENSMUST00000088200 FGLGSALKWPSALPTILQISIAFGLAIGTLAQALGPVSGGHINPAITLALLIGNQISLLR 86
ENSRNOT00000040874 FGLGSALKWPSALPTILQISIAFGLAIGTLAQALGPVSGGHINPAITLALLIGNQISLLR 86
ENST000000293599 FGLGSALKWPSALPTILQIALAFGLAIGTLAQALGPVSGGHINPAITLALLVGNQISLLR 86
ENSGALT00000041244 IGLGSALKWPSALPSILQISLAFGLAIGTLVQAFGHISGAHINPAVTIAFFVGNQISFLR 67
ENSGALT00000041246 IGLGSALKWPSALPSILQISLAFGLAIGTLVQAFGHISGAHINPAVTIAFFVGNQISFLR 83
ENSGALT0000004288 IGLGSALKWPSALPSILQISLAFGLAIGTLVQAFGHISGAHINPAVTIAFFVGNQISFLR 120
                               :*****:*****:*****:***:***:*****:*****:*****:***

ENSMUST00000042340 AIFYVAAQLVGAIAAGILYWLAPGNARGNLAVN---ALSNNTTPGKAVVVELILTFQLA 143
ENSRNOT00000024102 AVFYVAAQLVGAIAAGILYWLAPLNARGNLAVN---ALNNNTTPGKAMVVELILTFQLA 143
ENSMUST00000088200 AIFYVAAQLVGAIAAGILYWLAPGNARGNLAVN---AQQHNRQGRGGVNLDFPAGPL 143
ENSRNOT00000040874 AVFYVAAQLVGAIAAGILYWLAPLNARGNLAVNAVTEQQHNAWQGHGGVNLDFPASPL 146
ENST000000293599 AFFYVAAQLVGAIAAGILYGVAPLNARGNLAVN---ALNNNTTQGGQAMVVELILTFQLA 143
ENSGALT00000041244 TLFYVIAQLVGAIAAGILYGVTPANTRGNLAIN---SLNNNTTPGQAVVEMILTFQLA 124
ENSGALT00000041246 TLFYVIAQLVGAIAAGILYGVTPANTRGNLAIN---SLNNNTTPGQAVVEMILTFQLA 140
ENSGALT0000004288 TLFYVIAQLVGAIAAGILYGVTPANTRGNLAIN---SLNNNTTPGQAVVEMILTFQLA 177
                               :.*** *****:***:***:*****:*. :*: *:. *:: :.

ENSMUST00000042340 LCIFSTDSRRTSPVGGSPALSIGLSVTLGHLVGIYFTGCSMNPARSFGPAVVMNRFSPSH 203
ENSRNOT00000024102 LCIFSTDSRRTSPVGGSPALSIGLSVTLGHLVGIYFTGCSMNPARSFGPAVVMNRFSPSH 203
ENSMUST00000088200 HLLHLGLPP--HQPGGLPSLIHWLVGHTGPPSCGDLHLRHFHEPSPIFRPCGGHESVQPLS 201
ENSRNOT00000040874 HLLHLRSLP--NQPCGLPSLIHWLVGHTGPPSCGDLHLRHFHEPSPIFRPCGGHEPVQPLS 204
ENST000000293599 LCIFASTDSRRTSPVGGSPALSIGLSVTLGHLVGIYFTGCSMNPARSFGPAVVMNRFSPA 203
ENSGALT00000041244 ACIFASTDNRNNGNVGSPALSIGLSVAVGHLVGVSVRGGTIGWKKSMEPSVTKKERSIAV 184
ENSGALT00000041246 ACIFASTDNRNNGNVGSPALSIGLSVAVGHLVGVSVRG---GWGRNFS-RMPILILSPIA 196
ENSGALT0000004288 ACIFASTDNRNNGNVGSPALSIGLSVAVGHLVGL-----YCCQLNPAKEVAQSSPPW 229
                               :* *:* * * * * :

ENSMUST00000042340 WVFVWGPVIGAVLAAILYFYLLFPSSLSLHDRVAVVKGTYEPEEDWEDHREERKKTIELT 263
ENSRNOT00000024102 WVFVWGPVIGAVLAAILYFYLLFPSSLSLHDRVAVVKGTYEPEEDWEDHREERKKTIELT 263
ENSMUST00000088200 LGLLGRITVIGAVLAAILYFYLLFPSSLSLHDRVAVVKGTYEPEEDWEDHREERKKTIELT 261
ENSRNOT00000040874 LGLLGR-IVGAVLAAILYFYLLFPSSLSLHDRVAVVKGTYEPEEDWEDHREERKKTIELT 263
ENST000000293599 WVFVWGPVIGAVLAAILYFYLLFPNSLSLSEVAIKGTYEPEDEWEEQREERKKTIELT 263
ENSGALT00000041244 CVFVWGPVIGAVLAAILYFYLLVVPYCMNMSDRVAIVKGTYESEEWEEQREERKKSMELT 244
ENSGALT00000041246 FVFVWGPVIGAVLAAILYFYLLVVPYCMNMSDRVAIVKGTYESEEWEEQREERKKSMELT 256
ENSGALT0000004288 WVFVWGPVIGAVLAAILYFYLLVVPYCMNMSDRVAIVKGTYESEEWEEQREERKKSMELT 289
                               : *:* *:******:* * .: : :*****:*****:*****:*****:***

ENSMUST00000042340 AH 265
ENSRNOT00000024102 AH 265
ENSMUST00000088200 AH 263
ENSRNOT00000040874 AH 265
ENST000000293599 TR 265
ENSGALT00000041244 PP 246
ENSGALT00000041246 PP 258
ENSGALT0000004288 PP 291

```

AQP6 - CLUSTAL W (1.83) multiple sequence alignment

```
ENSRNOT0000000323 MEPGLCNRAYLLVGGLWTAISKALFAEFLATGLYVFFGVGVSVPWPVALPSVLQVAITFN 60
ENSRNOT00000049837 MEPGLCNRAYLLVGGLWTAISKALFAEFLATGLYVFFGVGVSVPWPVALPSVLQVAITFN 60
ENSMUST00000023754 MEPGLCSRAYLLVGGLWTAISKALFAEFLATGLYVFFGVGVSVPWPVALPSVLQIAITFN 60
ENSGALT00000016693 -----
ENST00000315520 -----
ENST00000394984 -----
ENST00000394985 -----

ENSRNOT0000000323 LATATAVQISWKTSGAHANPAVTLAYLVGSHISLPRAVAYIAAQLAGATVGAALLYGVTP 120
ENSRNOT00000049837 LATATAVQISWKTSGAHANPAVTLAYLVGSHISLPRAVAYIAAQLAGATVGAALLYGVTP 120
ENSMUST00000023754 LATATAVQISWKTSGAHANPAVTLAYLVGSHISLPRAMAYIAAQLAGATAGAALLYGVTP 120
ENSGALT00000016693 -----
ENST00000315520 -----M 1
ENST00000394984 -----M 1
ENST00000394985 -----M 1

ENSRNOT0000000323 GGVRETLGVNVVHNSTSTGQAVAVELVLTLLQLV-LCVFASMDSRQ--TLGSP-----AAM 172
ENSRNOT00000049837 GGVRETLGVNVVHNSTSTGQAVAVELVLTLLQLV-LCVFASMDSRQ--TLGSP-----AAM 172
ENSMUST00000023754 GGIRETLGVNVVHNSTSTGQAVAVELVLTLLQLV-LCVFASMDGRQ--TLASP-----AAM 172
ENSGALT00000016693 -----LHNETTTGQAVTVLFLTFQLV-LCIFASTDERREDNMGSP-----ALS 43
ENST00000315520 DAVEPGGRGWASMLACRLWKAISRALFAEFLATGLYVFFGVGVSVMRWPTALPSVLQIAIT 61
ENST00000394984 DAVEPGGRGWASMLACRLWKAISRALFAEFLATGLYVFFGVGVSVMRWPTALPSVLQIAIT 61
ENST00000394985 DAVEPGGRGWASMLACRLWKAISRALFAEFLATGLYVFFGVGVSVMRWPTALPSVLQIAIT 61
                                     :*:: * . : . * :* . . . * *

ENSRNOT0000000323 IGTSVALGHLIGIYFTGCSMNPARSFGPAVIVG---KFAVHWIFWVGPLTGAVL-ASLIY 228
ENSRNOT00000049837 IGTSVALGHLIGIYFTGCSMNPARSFGPAVIVG---KFAVHWIFWVGPLTGAVL-ASLIY 228
ENSMUST00000023754 IGTSVALGHLIGIYFTGCSMNPARSFGPAVIVG---KFAVHWIFWVGPLTGAVL-ASLIY 228
ENSGALT00000016693 IGLSVAVGHLLGIRYTGCSMNPARSFAPAVIVG---DFSDHWVFWVGPLVGA---ASIIY 99
ENST00000315520 FNLVTAMAVQVTWKASGAHANPAVTL--AFLVGSHISLPRAVAYVAAQLVGATVGAALLY 119
ENST00000394984 FNLVTAMAVQVTWKASGAHANPAVTL--AFLVGSHISLPRAVAYVAAQLVGATVGAALLY 119
ENST00000394985 FNLVTAMAVQVTWKASGAHANPAVTL--AFLVGSHISLPRAVAYVAAQLVGATVGAALLY 119
: . .*: . : :* . *** :: *:* ** . : . : . * . * . *:::*

ENSRNOT0000000323 NFILFPDTKTVAQRLAILVGT-----KVEKVVLDLEPQKKE----- 264
ENSRNOT00000049837 NFILFPDTKTVAQRLAILVGT-----KVEKVVLDLEPQKKE----- 264
ENSMUST00000023754 NFILFPDTKTVAQRLAILVGT-----KVEKVVLDLEPQKKE----- 264
ENSGALT00000016693 NYVLFPPQSKTFSERLAIFK-----MEPEEDW----- 126
ENST00000315520 GVMPGDIRETLGINVVRNSVSTGQAVAVELLLTLQLVLCVFASTDSRQTSGPSATMIGIS 179
ENST00000394984 GVMPGDIRETLGINVAPPTS-----ALRFPSS----- 149
ENST00000394985 GVMPGDIRETLGINVVRNSVSTGQAVAVELLLTLQLVLCVFASTDSRQTSGPSATMIGIS 179
. : :* . . : . . .

ENSRNOT0000000323 -----SQTNSDTEVSV----- 276
ENSRNOT00000049837 -----SQTNSDTEVSV----- 276
ENSMUST00000023754 -----SQTNSDTECLTSPCEEAVRSFSFTLGLC----- 293
ENSGALT00000016693 -----AEREA----- 131
ENST00000315520 VALGHLIGIHF'TGCSMNPARSFGPAIIIGKF'VHWVFWVGPLMGALLASLIYNFVLPDPT 239
ENST00000394984 -----LHLEACLTRP-----FSIS----- 163
ENST00000394985 VALGHLIGIHF'TGCSMNPARSFGPAIIIGKF'VHWVFWVGPLMGALLASLIYNFVLPDPT 239
. .

ENSRNOT0000000323 -----
ENSRNOT00000049837 -----
ENSMUST00000023754 -----
ENSGALT00000016693 -----
ENST00000315520 KTLAQLAILTGTVEVGTGAGAGAEPLKESQPGSGAVEMESV 282
ENST00000394984 -----
ENST00000394985 KTLAQLAILTGTVEVGTGAGAGAEPLKESQPGSGAVEMESV 282
```



AQP7 - CLUSTAL W (1.83) multiple sequence alignment

```

ENSMUST00000030136 -----MAPRSVLETIQSVL--QKNMVREFLAEFLLSTYVMMVFGLGSAVAH 42
ENSMUST00000054945 -----MAPRSVLETIQSVL--QKNMVREFLAEFLLSTYVMMVFGLGSAVAH 42
ENSMUST00000116345 -----MAPRSVLETIQSVL--QKNMVREFLAEFLLSTYVMMVFGLGSAVAH 42
ENSRNOT00000012975 -----MAG-SVLENIQSVL--QKTWVREFLAEFLLSTYVLMVFGLGSAVAH 41
ENST00000297988 MVQASGHR-RSTRGSKMVSWSVIAKIQEIL--QRKMVREFLAEFMSTYVMMVFGLGSAVAH 57
ENST00000379507 --MGSGHCLRSTRGSKMVSWSVIAKIQEIL--QRKMVREFLAEFMSTYVMMVFGLGSAVAH 56
ENST00000379506 --MGSGHCLRSTRGSKMVSWSVIAKIQEIL--QRKMVREFLAEFMSTYVMMVFGLGSAVAH 56
ENST00000379503 -----MGWATFTD-----QGEEGLEPSGPWKTSHTR----- 26
ENSGALT0000003866 -----MLEKIQKMLTIRSNVRELLAEALGMYYLMLVGLSSVAQ 39
                                     :           :           *           .           :

ENSMUST00000030136 MVLGE-NSGSYLGVNLFQGFQVMTMGVHVAGGISGAHMNAAVFTFNCALGRMTWKKFPVYV 101
ENSMUST00000054945 MVLGE-NSGSYLGVNLFQGFQVMTMGVHVAGGISGAHMNAAVFTFNCALGRMTWKKFPVYV 101
ENSMUST00000116345 MVLGE-NSGSYLGVNLFQGFQVMTMGVHVAGGISGAHMNAAVFTFNCALGRMTWKKFPVYV 101
ENSRNOT00000012975 MVLGE-RLGSYLGVNLFQGFQVMTMGIVHAGGISGAHMNAAVFTFNCALGRMAWKFPFIYV 100
ENST00000297988 MVLNK-KYGSYLGVNLFQGFQVMTMGVHVAGRISGAHMNAAVTFANCALGRVPWRKFPVYV 116
ENST00000379507 MVLNK-KYGSYLGVNLFQGFQVMTMGVHVAGRISGAHMNAAVTFANCALGRVPWRKFPVYV 115
ENST00000379506 MVLNK-KYGSYLGVNLFQGFQVMTMGVHVAGRISGAHMNAAVTFANCALGRVPWRKFPVYV 115
ENST00000379503 -----AHMNAAVTFANCALGRVPWRKFPVYV 52
ENSGALT0000003866 TVLGKGEFGQYLSINLGFQVMTMGVHVAGGISGAHNAATLTHCMFQNLPRKLPVYL 99
                                     **:*:*:*:*:*:*:*:*:*:*:*:*:*:*

ENSMUST00000030136 LGQFLGSFSAAAATTYLIFYGAINHFAGGDLVLTGSKATANIFATYLPDYMTLWRGFLDEA 161
ENSMUST00000054945 LGQFLGSFSAAAATTYLIFYGAINHFAGGDLVLTGSKATANIFATYLPDYMTLWRGFLDEA 161
ENSMUST00000116345 LGQFLGSFSAAAATTYLIFYGAINHFAGGDLVLTGSKATANIFATYLPDYMTLWRGFLDEA 161
ENSRNOT00000012975 LGQFLGSFSLAAATTYLIFYGAINHYAGGELLVTPGPKSTANIFATYLPDYMTLWRGFLDEA 160
ENST00000297988 LGQFLGSFSLAAATYISLFYTAILHFSGGQMLVTPGVPATAGIFATYLPDYMTLWRGFLNEA 176
ENST00000379507 LGQFLGSFSLAAATYISLFYTAILHFSGGQMLVTPGVPATAGIFATYLPDYMTLWRGFLNEA 175
ENST00000379506 LGQFLGSFSLAAATYISLFYTAILHFSGGQMLVTPGVPATAGIFATYLPDYMTLWRGFLNEA 175
ENST00000379503 LGQFLGSFSLAAATYISLFYTAILHFSGGQMLVTPGVPATAGIFATYLPDYMTLWRGFLNEA 112
ENSGALT0000003866 LGQFLGSFSLAAATIFGLYDALHDYTNQNFVTPGPTATASIFSTYSPSPYSLTGGFFTEF 159
***** ** : : * * : : : * : : * : * : * : * : * : * : * : * : *

ENSMUST00000030136 FVTGMLQLCLFAITDKKNSPALQGTPELVIGILVTVLGVSLGMNSGYAINPSRDLPPLRF 221
ENSMUST00000054945 FVTGMLQLCLFAITDKKNSPALQGTPELVIGILVTVLGVSLGMNSGYAINPSRDLPPLRF 221
ENSMUST00000116345 FVTGMLQLCLFAITDKKNSPALQGTPELVIGILVTVLGVSLGMNSGYAINPSRDLPPLRF 221
ENSRNOT00000012975 FVTGMLQLCIFAITDKLNSPALQGTPELMIGILVTVLGVSLGMNTGYAINPSRDLPPLRF 220
ENST00000297988 WLTGMLQLCLFAITDQENNPALPGTEALVIGILVVIIGVSLGMNTGYAINPSRDLPPLRF 236
ENST00000379507 WLTGMLQLCLFAITDQENNPALPGTEALVIGILVVIIGVSLGMNTGYAINPSRDLPPLRF 235
ENST00000379506 WLTGMLQLCLFAITDQENNPALPGTEALVIGILVVIIGVSLGMNTGYAINPSRDLPPLRF 235
ENST00000379503 WLTGMLQLCLFAITDQENNPALPGTEALVIGILVVIIGVSLGMNTGYAINPSRDLPPLRF 172
ENSGALT0000003866 IATVMLLLGILVIHDEKNNGALKGTHALLTGILVIGIGMGMNTGYAINPSRDLPPLRF 219
* * * : : * * : * * * * : * : * : * : * : * : * : * : * : *

ENSMUST00000030136 TFIAGWGKQVFRAGNWWWVVPVAPLLGAYLGGIVYLGLIHPSIPQDPQRLNFTARDQK 281
ENSMUST00000054945 TFIAGWGKQVFRAGNWWWVVPVAPLLGAYLGGIVYLGLIHPSIPQDPQRLNFTARDQK 281
ENSMUST00000116345 TFIAGWGKQVFRAGNWWWVVPVAPLLGAYLGGIVYLGLIHPSIPQDPQRLNFTARDQK 281
ENSRNOT00000012975 TFIAGWGKQVFSAGNWWWVVPVAPLLGAYLGGIVYLGLIHAGIP--PQ----- 267
ENST00000297988 TFIAGWGKQVFSNGENWWWVVPVAPLLGAYLGGIYLVFVIGSTIPREPLKLEDSVAYEDH 296
ENST00000379507 TFIAGWGKQVFSNGENWWWVVPVAPLLGAYLGGIYLVFVIGSTIPREPLKLEDSVAYEDH 295
ENST00000379506 TFIAGWGKQVFR-----YCPGPF----- 256
ENST00000379503 TFIAGWGKQVFR-----YCPGPF----- 193
ENSGALT0000003866 TAIAGWGDVFRAGNYWWWVVPVAPTLGSLAGGLIHKLLID--IHNQPVLERGNEKQTV 277
* * * * * . * * : * * * *

ENSMUST00000030136 VTASYKNAASANISGSVPLEHF----- 303
ENSMUST00000054945 VTASYKNAASANISGSVPLEHF----- 303
ENSMUST00000116345 VTASYKNAASANISGSVPLEHF----- 303
ENSRNOT00000012975 -----GS----- 269
ENST00000297988 GITVLPKMGSHIPTISPLTPVSVSPANRSSVHPAPPLHESMALEHF 342
ENST00000379507 GITVLPKMGSHIPTISPLTPVSVSPANRSSVHPAPPLHESMALEHF 341
ENST00000379506 ----- 281
ENST00000379503 ----- 281
ENSGALT0000003866 VESS----- 281

```

AQP8 - CLUSTAL W (1.83) multiple sequence alignment

```
ENSMUST00000033023   MSGEQTPMCSMDLPEVKVKTS--MAGRCRVFWYEQYVQPCIVELVGSALFIFIGCLSVIE 58
ENSMUST00000098056   MPAEHAPTS-----CFCSQLYR----- 17
ENSRNOT00000019939   FSLRQTPMCSMDLREIKGKETNMADSYHGMSWYEQYIQPCVVELLGSALFIFIGCLSVIE 60
ENST00000219660     MSG-EIAMCEPEFGNDKAREPS-VGGRWRVSWYERFVQPCLVELLGSALFIFIGCLSVIE 58
ENSGALT00000009629   LGGQPSTKEAMEMVDAERPPAK-----QNWYECYVLPCLAELLGSAAFVFIGCLSVVE 53
:                   :                   :

ENSMUST00000033023   NSPNTGLLQPALAHGLALGLI IATLGNISGGHFNPAVSLAVTVIGGLKTMLLIPYWISQL 118
ENSMUST00000098056   -----LG----GHFNPAVSLAVTVIGGLKTMLLIPYWISQL 49
ENSRNOT00000019939   NSPNTGLLQPALAHGLALGLI IATLGNISGGHFNPAVSLAVTVIGGLKTMLLIPYVWSQL 120
ENST00000219660     NGTDTGLLQPALAHGLALGLI IATLGNISGGHFNPAVSLAAMLIGGLNLVMLLPYVWSQL 118
ENSGALT00000009629   DSIGTGLLQPALVHGLSIVPIVVS LGNISGAHINPVVSLGIWLVGGMKLMILPYCIAQL 113
                   **      .:*:.***.  :::: : ::*: ** :*:

ENSMUST00000033023   FGGLIGAALAKVVSPEERFWNASGAAFAIVQEQQEVAEALGIEIILTMLLVLAVCMGAVN 178
ENSMUST00000098056   FGGLIGAALAKVVSPEERFWNASGAAFAIVQEQQEVAEALGIEIILTMLLVLAVCMGAVN 109
ENSRNOT00000019939   FGMIGAALAKVVSPEERFWNASGAAFAIVQEQQEVAEALGVEIVMTMLLVLAVCMGAVN 180
ENST00000219660     LGGMLGAALAKAVSPEERFWNASGAAFVTVQEQQQVAGALVAEIIITTLALAVCMGAIN 178
ENSGALT00000009629   CGGILGAALTKAVASSLNFDNRVGGAFGI IRTNAQIGPALGNEIILTTFLLLVVCMTAVN 173
                   *: :*****:*.*:.. .* . *.* **  : : *:. **  *::: * : * .*** *:*

ENSMUST00000033023   EKTMGPLAPFSIGFSVIVDILAGGSISGACMNPARAFGPAVMAGYWDFHWIYWLGPFLAG 238
ENSMUST00000098056   EKTMGPLAPFSIGFSVIVDILAGGSISGACMNPARAFGPAVMAGYWDFHWIYWLGPFLAG 169
ENSRNOT00000019939   EKTMGPLAPFSIGFSVIVDILAGGGISGACMNPARAFGPAVMAGYWDFHWIYWLGPFLAG 240
ENST00000219660     EKTGKPLAPFSIGFAVTVDILAGGPVSGGCMNPARAFGPAVVANHWNFHWIYWLGPFLAG 238
ENSGALT00000009629   GETKSPLAPVCIALTVVINIIVGGSISGPCMNPARAFGPAVIANHWYHWYVWVGPLIGC 233
                   :* .*****.*.*:.* :*:.* ** *****:*.:* :*:***:***:

ENSMUST00000033023   LfvGLLIRLLIGDEKTRLILKSR 261
ENSMUST00000098056   LfvGLLIRLLIGDEKTRLILKSR 192
ENSRNOT00000019939   LfvGLLIRLFIGDEKTRLILKSR 263
ENST00000219660     LLVGLLIRCFIGDGKTRLILKAR 261
ENSGALT00000009629   LISSLLIRFVIGDRKIRLFLK-- 254
                   *: .***** .*** * **:**
```



AQP10 - CLUSTAL W (1.83) multiple sequence alignment

```
ENST00000324978      MVFTQAPAEIMGHLRIRSLARQCLAEFLGVFVLMMLLTQGAVAQAVTSGETKGNFFTMFL 60
ENST00000355197      MVFTQAPAEIMGHLRIRSLARQCLAEFLGVFVLMMLLTQGAVAQAVTSGETKGNFFTMFL 60
*****

ENST00000324978      AGSLAVTIAIYVGGNVSGAHLNPAFSLAMCIVGRLPWVKLPIYILVQLLSAFCASGATYV 120
ENST00000355197      AGSLAVTIAIYVGGNVSGAHLNPAFSLAMCIVGRLPWVKLPIYILVQLLSAFCASGATYV 120
*****

ENST00000324978      LYHDALQNYTGGNLTVTGPKETASIFATYPAPYLSLNNGFLDQVLGTGMLIVGLLAILDR 180
ENST00000355197      LYHDALQNYTGGNLTVTGPKETASIFATYPAPYLSLNNGFLDQVLGTGMLIVGLLAILDR 180
*****

ENST00000324978      RNKGVPALEPVVVGMLLILALGLSMGANCGIPLNPARDLGPRLFYVAGWGPEVFSAGNG 240
ENST00000355197      RNKGVPALEPVVVGMLLILALGLSMGANCGIPLNPARDLGPRLFYVAGWGPEVFRWET- 239
*****

ENST00000324978      WWWVPVAPLVGATVGTATYQLLVALHHPEGPEPAQDLVSAQHKASELETTPASQMLECK 300
ENST00000355197      -----DSPGAG-----LHSPS-----SAKG-----SVPGSTALCL-- 264
                : *:.          ** *.          **:          ..*.*: :

ENST00000324978      L 301
ENST00000355197      -
```

AQP11 - CLUSTAL W (1.83) multiple sequence alignment

```
ENSRNOT00000018091 MSALLGLPPEVQDTCISLGLMLLVVLFMGLARVIARQQLH-RPMVHAFVLEFLATFQLCY 59
ENSRNOT00000038705 MSALLGLPPEVQDTCISLGLMLLVVLFMGLARVIARQQLH-RPMVHAFVLEFLATFQLCY 59
ENSMUST00000055379 MSALLGLRPEVQDTCISLGLMLLVVLFVGLARVIARQQLH-RPVVHAFVLEFLATFQLCC 59
ENSMUST00000084986 MSALLGLRPEVQDTCISLGLMLLVVLFVGLARVIARQQLH-RPVVHAFVLEFLATFQLCC 59
ENST00000313578 MSPLLGLRSELQDTCISLGLMLSVVLLMGLARVVARQQLH-RPVAHAFVLEFLATFQLCC 59
ENSGALT00000002458 ASGTVAMAAG--GIWMSLGLMAAVVAAGLCSRSLALRRLHARPHLCSFLELLSTFQVCA 58
* :.: . . ***** .* :*. * :* :.* * * :*:*:*:*:*:*:*

ENSRNOT00000018091 CTHELQLLSEQDSGHPTWTLTLIYFFSLVHGLTLVGTASNPCGVMMQMILGGMSPEMGAV 119
ENSRNOT00000038705 CTHELQLLSEQDSGHPTWTLTLIYFFSLVHGLTLVGTASNPCGVMMQMILGGMSPEMGAV 119
ENSMUST00000055379 CTHELQVLSEQDSAHPPTWTLTLIYFFSLVHGLTLVGTASNPCGVMMQMILGGMSPEMGAV 119
ENSMUST00000084986 CTHELQVLSEQDSAHPPTWTLTLIYFFSLVHGLTLVGTASNPCGVMMQMILGGMSPEMGAV 119
ENST00000313578 CTHELQLLSEQHPAHPPTWTLTLVYFFSLVHGLTLVGTSSNPCGVMMQMMLGGMSPETGAV 119
ENSGALT00000002458 CTNELSLLGNTEP-RPHTALTLTYGFTVLHGLTLPGSTCNPCTLQPLWGGRTSARAGGL 117
*:**.*:*.: . . :* :*** * *:::***** *::.***.: : * *..*.:

ENSRNOT00000018091 RLMAQLVSALCSRYCISALWSLSLTKYHFDERILACRNPINTDISKAIIEAICSFIFHS 179
ENSRNOT00000038705 RLMAQLVSALCSRYCISALWSLSLTKYHFDERILACRNPINTDISKAIIEAICSFIFHS 179
ENSMUST00000055379 RLLAQLVSALCSRYCISALWSLSLTKYHYDERILACRNP IHTDMSKAIIEAICSFIFHS 179
ENSMUST00000084986 RLLAQLVSALCSRYCISALWSLSLTKYHYDERILACRNP IHTDMSKAIIEAICSFIFHS 179
ENST00000313578 RLLAQLVSALCSRYCTSALWSLGLTQYHVSERSFACKNP IRVDLLKAVITEAVCSFLFHS 179
ENSGALT00000002458 KIWAQFAAAVLRVFMHFIWRLEMAESHGALGTQGCNPMQTTEVQAFCELLFSVVFQL 177
:: **.:**.: * :* * ::: * . .* **:. . :*. * :*.:**.:

ENSRNOT00000018091 ALLHFQEVRTKLR IHVLAALITFLAYAGGSLTGALFNPALALSLHFPCFDES FYKFFVY 239
ENSRNOT00000038705 ALLHFQEVRTKLR IHVLAALITFLAYAG----- 207
ENSMUST00000055379 ALLHFQEVRTKLR IHLLAALITFLAYAG----- 207
ENSMUST00000084986 ALLHFQEVRTKLR IHLLAALITFLAYAGGSLTGALFNPALALSLHFPCFDEL FYKFFVY 239
ENST00000313578 ALLHFQEVRTKLR IHLLAALITFLVYAGGSLTGAVFNPALALSLHFMCDFEAF PQFFIVY 239
ENSGALT00000002458 TILQVENIKPSYRVHVAALLITMLVFAG----- 205
*:*. :. :. :. *:* :* ***:*.:**

ENSRNOT00000018091 WVAPSLGVLLMILMFSFFLPWLHNNQLSNKKE 271
ENSRNOT00000038705 -----VLLMILMFSFFLPWLHNN----- 225
ENSMUST00000055379 -----VLMILMFSFFLPWLHNNQMTNKKE 232
ENSMUST00000084986 WLAPSVGVLLMILMFSFFLPWLHNNQMTNKKE 271
ENST00000313578 WLAPSLGILLMILMFSFFLPWLHNNHTINKKE 271
ENSGALT00000002458 -----
```
