# Supplementary material for: Integrative sequence and tissue expression profiling of chicken and mammalian aquaporins
Source: Springer Nature journal article supplement (doi:10.1186/1471-2164-10-s2-s7), 2009-01-01
Supplement: Additional file 2 [file 1471-2164-10-s2-s7-s2.docx]

| **Aquaporin Type** | **UniGene ID** | **Transcripts per Million (TPM)** | **Spot Intensity based on TPM** |
| --- | --- | --- | --- |
| AQP12 | Hs.437167 | 27 | 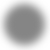 |
| AQP12 | Mm.235537 | 243 | 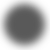 |
| AQP12 | Gga.19694 | 411 | 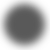 |
